# Supplementary material for: Gasdermin D is the only Gasdermin that provides protection against acute Salmonella gut infection in mice
Source: PubMed Central journal article supplement (PMC10691232; doi:10.1073/pnas.2315503120), 2023-11-21
Supplement: pnas.2315503120.sapp.pdf [file pnas.2315503120.sapp.pdf]

## Supporting information

### **Gasdermin D is the only Gasdermin that provides protection against acute *Salmonella* gut infection in mice**

Stefan A. Fattinger<sup>1,2,3,†\*</sup>, Luca Maurer<sup>1,†</sup>, Petra Geiser<sup>2</sup>, Elliott M. Bernard<sup>4</sup>, Ursina Enz<sup>1</sup>, Suwannee Ganguillet<sup>1</sup>, Ersin Gül<sup>1</sup>, Sanne Kroon<sup>1</sup>, Benjamin Demarco<sup>4</sup>, Vanessa Mack<sup>4</sup>, Markus Furter<sup>1</sup>, Manja Barthel<sup>1</sup>, Pawel Pelczar<sup>5</sup>, Feng Shao<sup>6</sup>, Petr Broz<sup>4</sup>, Mikael E. Sellin<sup>2\*</sup>, Wolf-Dietrich Hardt<sup>1\*</sup>

#### Affiliations:

<sup>1</sup> Institute of Microbiology, Department of Biology, ETH Zurich, Zurich, Switzerland

<sup>2</sup> Science for Life Laboratory, Department of Medical Biochemistry and Microbiology, Uppsala University, Uppsala, Sweden

<sup>3</sup> Division of Immunology and Molecular Medicine, Department of Molecular and Cell Biology, University of California, Berkeley, CA, USA.

<sup>4</sup> Department of Immunobiology, University of Lausanne, Epalinges, Switzerland

<sup>5</sup> Center for Transgenic Models, University of Basel, Basel, Switzerland.

<sup>6</sup> National Institute of Biological Sciences, 102206 Beijing, China

\* Correspondence: SAF; [sfattinger@berkeley.edu](mailto:sfattinger@berkeley.edu), MES; [mikael.sellin@imbim.uu.se](mailto:mikael.sellin@imbim.uu.se), WDH; [hardt@micro.biol.ethz.ch](mailto:hardt@micro.biol.ethz.ch)

† Contributed equally

Figure S1 - Supplementary figures to Fig 1

A

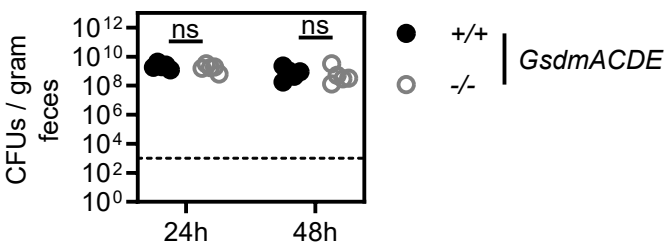

B

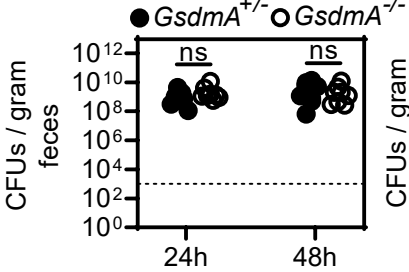

C

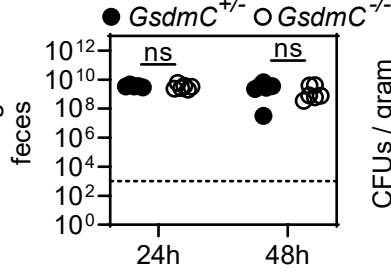

D

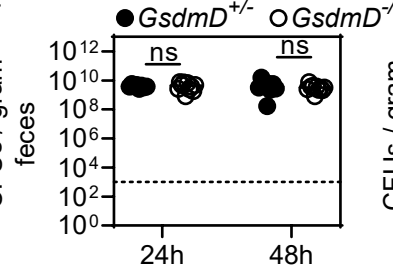

E

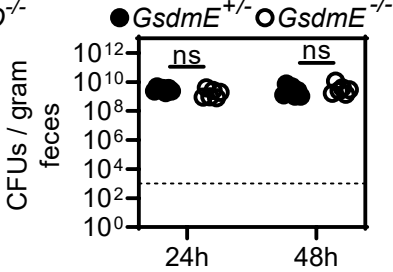

F

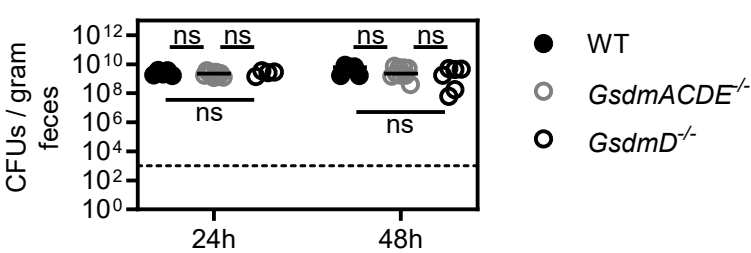

G

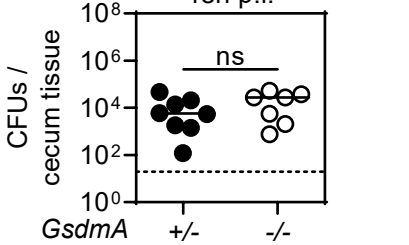

H

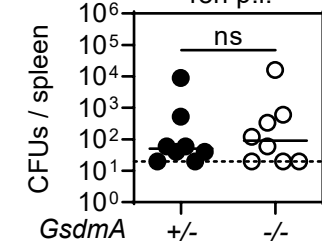

I

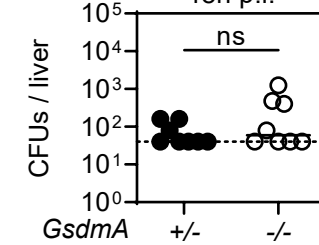

J

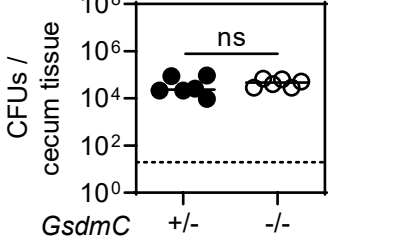

K

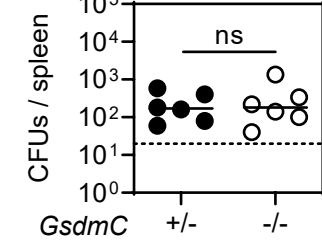

L

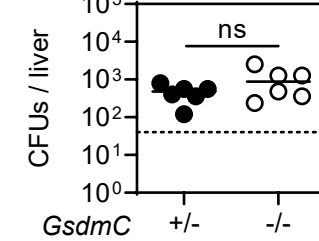

M

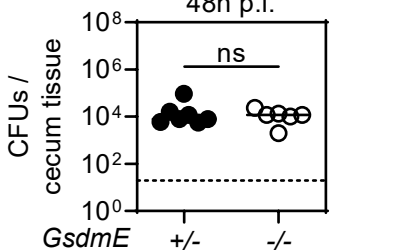

N

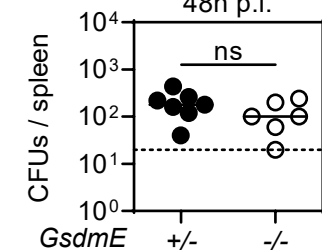

O

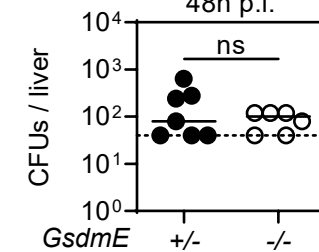

**Figure S1. (Supplementary Figure to Fig 1)**

(A) *S.Tm* pathogen loads in feces of 48h infections with WT and *GsdmACDE*<sup>-/-</sup> mice over time. (B-E) *S.Tm* pathogen loads in feces over time of littermate-controlled 48h infections with (B) GSDMA-deficient, (C) GSDMC-deficient, (D) GSDMD-deficient, and (E) GSDME-deficient mice. (F) *S.Tm* pathogen loads in feces of 48h infections with WT, *GsdmACDE*<sup>-/-</sup>, and *GsdmD*<sup>-/-</sup> mice over time. (G-I) 48h infection of *GsdmA*<sup>+/-</sup> and *GsdmA*<sup>-/-</sup> littermates (belongs to B). *S.Tm* pathogen loads in (G) cecum tissue, (H) spleen, and (I) liver. (J-L) 48h infection of *GsdmC*<sup>+/-</sup> and *GsdmC*<sup>-/-</sup> littermates (belongs to C). *S.Tm* pathogen loads in (J) cecum tissue, (K) spleen, and (L) liver. (M-O) 48h infection of *GsdmE*<sup>+/-</sup> and *GsdmE*<sup>-/-</sup> littermates (belongs to E). *S.Tm* pathogen loads in (M) cecum tissue, (N) spleen, and (O) liver. In all panels each data point represents one mouse. ≥5 mice per group from ≥2 independent experiments for each comparison. Line at median. Dotted line represents detection limit. Mann-Whitney U-test (ns - not significant).

**Figure S2 - Steady state analysis**

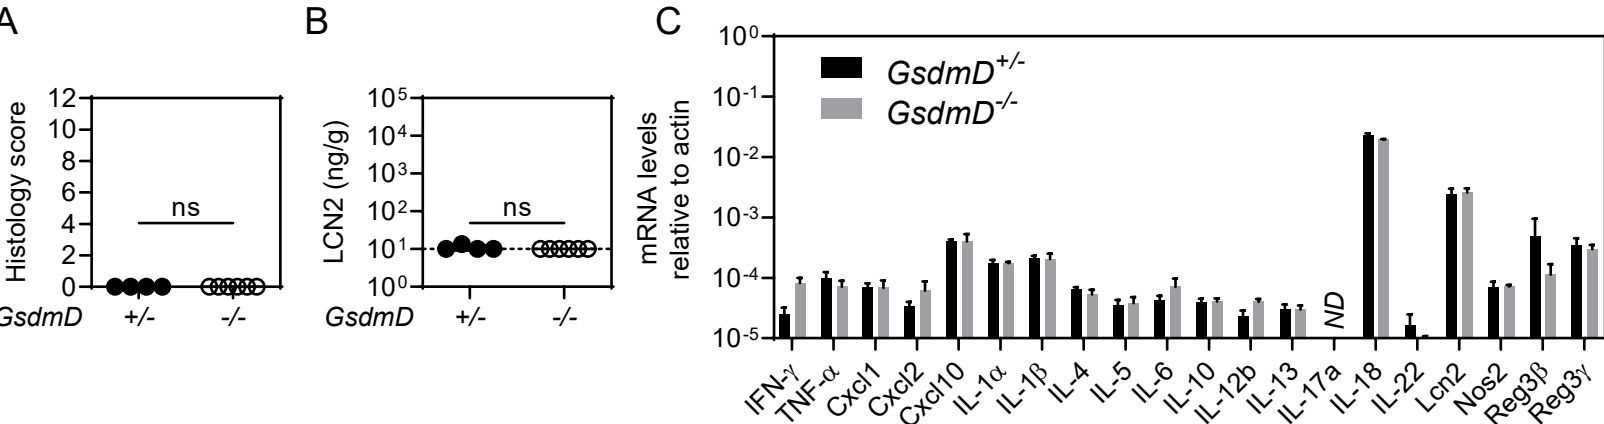

**Figure S2. (Steady state analysis of inflammation)**

(A-B) No detectable inflammatory pre-condition in the gut mucosa of GSDMD-deficient mice. (A) Microscopy-based quantification of histology scores from H&E-stained cecum tissue sections. (B) Lipocalin-2 levels of feces. In A, B, each data point represents one mouse. Line at median. Dotted line represents detection limit. (C) mRNA levels of pro-inflammatory cytokines and anti-microbial peptides. Means with SD are indicated. For all panels ≥4 mice per group. Mann-Whitney U-test (ns - not significant).

Figure S3 - Supplementary figures to Fig 2

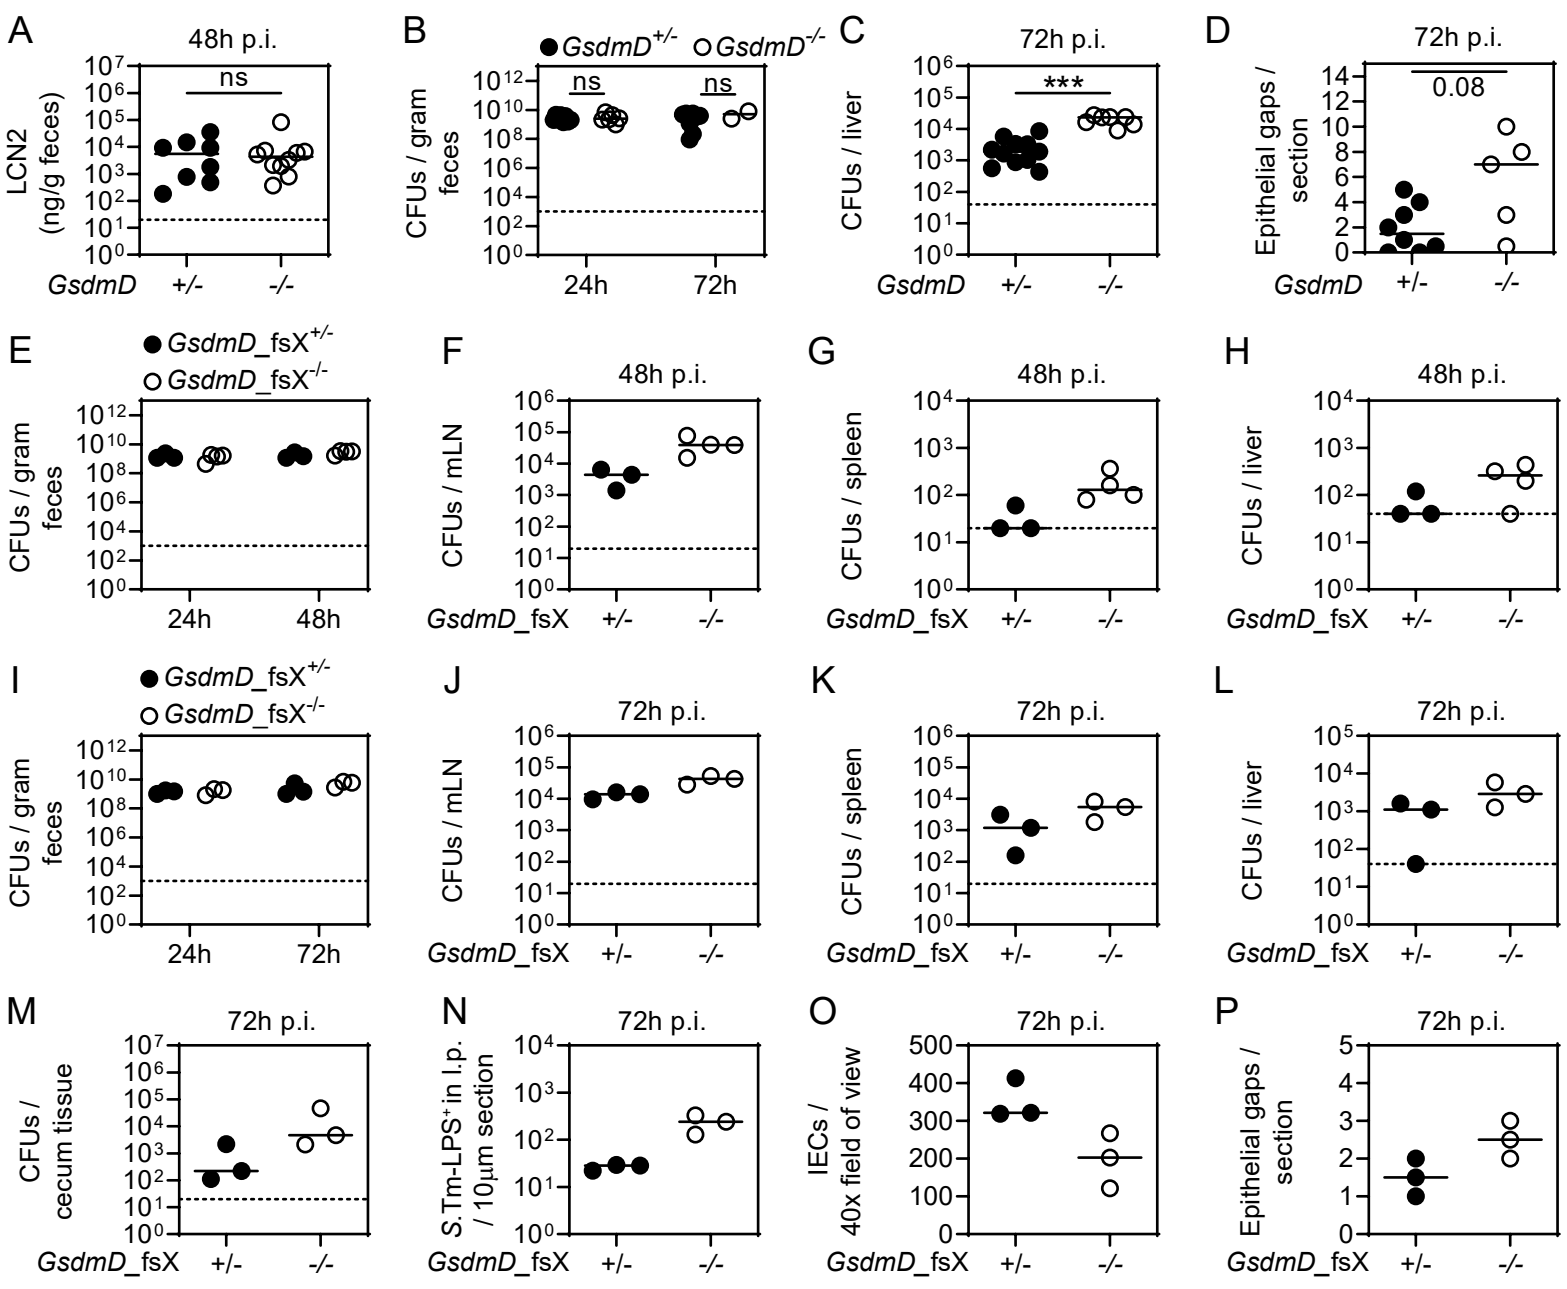

**Figure S3. (Supplementary figure to Fig 2)**  
**(A)** 48h infection of *GsdmD*<sup>+/+</sup> and *GsdmD*<sup>-/-</sup> littermates. Lipocalin-2 levels of feces at 48h p.i. **(B-D)** 72h infection of *GsdmD*<sup>+/+</sup> and *GsdmD*<sup>-/-</sup> littermates. *S.Tm* CFU pathogen loads in **(B)** feces over time and **(C)** liver. **(D)** Microscopy-based quantification of epithelial gaps in the cecum tissue at 72h p.i. **(E-P)** Independent GSDMD-deficient mouse line (caused by genetic frameshift, *GsdmD*<sub>fsX</sub>) exhibits same phenotype. **(E-H)** 48h infection of *GsdmD*<sub>fsX</sub><sup>+/+</sup> and *GsdmD*<sub>fsX</sub><sup>-/-</sup> littermates. *S.Tm* pathogen loads in **(E)** feces over time and at 48h p.i. in **(F)** mesenteric lymph nodes, **(G)** spleen, and **(H)** liver. **(I-P)** 72h infection of *GsdmD*<sub>fsX</sub><sup>+/+</sup> and *GsdmD*<sub>fsX</sub><sup>-/-</sup> littermates. *S.Tm* pathogen loads in **(I)** feces over time and at 72h p.i. in **(J)** mesenteric lymph nodes, **(K)** spleen, **(L)** liver, and **(M)** cecum tissue. Microscopy-based quantification at 72h p.i. of **(N)** *S.Tm*-LPS<sup>+</sup> cells in the lamina propria, **(O)** IECs per field of view, and **(P)** epithelial gaps per section. In all panels each data point represents one mouse. ≥3 mice per group. Line at median. Dotted line represents detection limit. Mann-Whitney U-test (ns - not significant, \*\*\*p<0.001).

Figure S4 - Supplementary figures to Fig 3

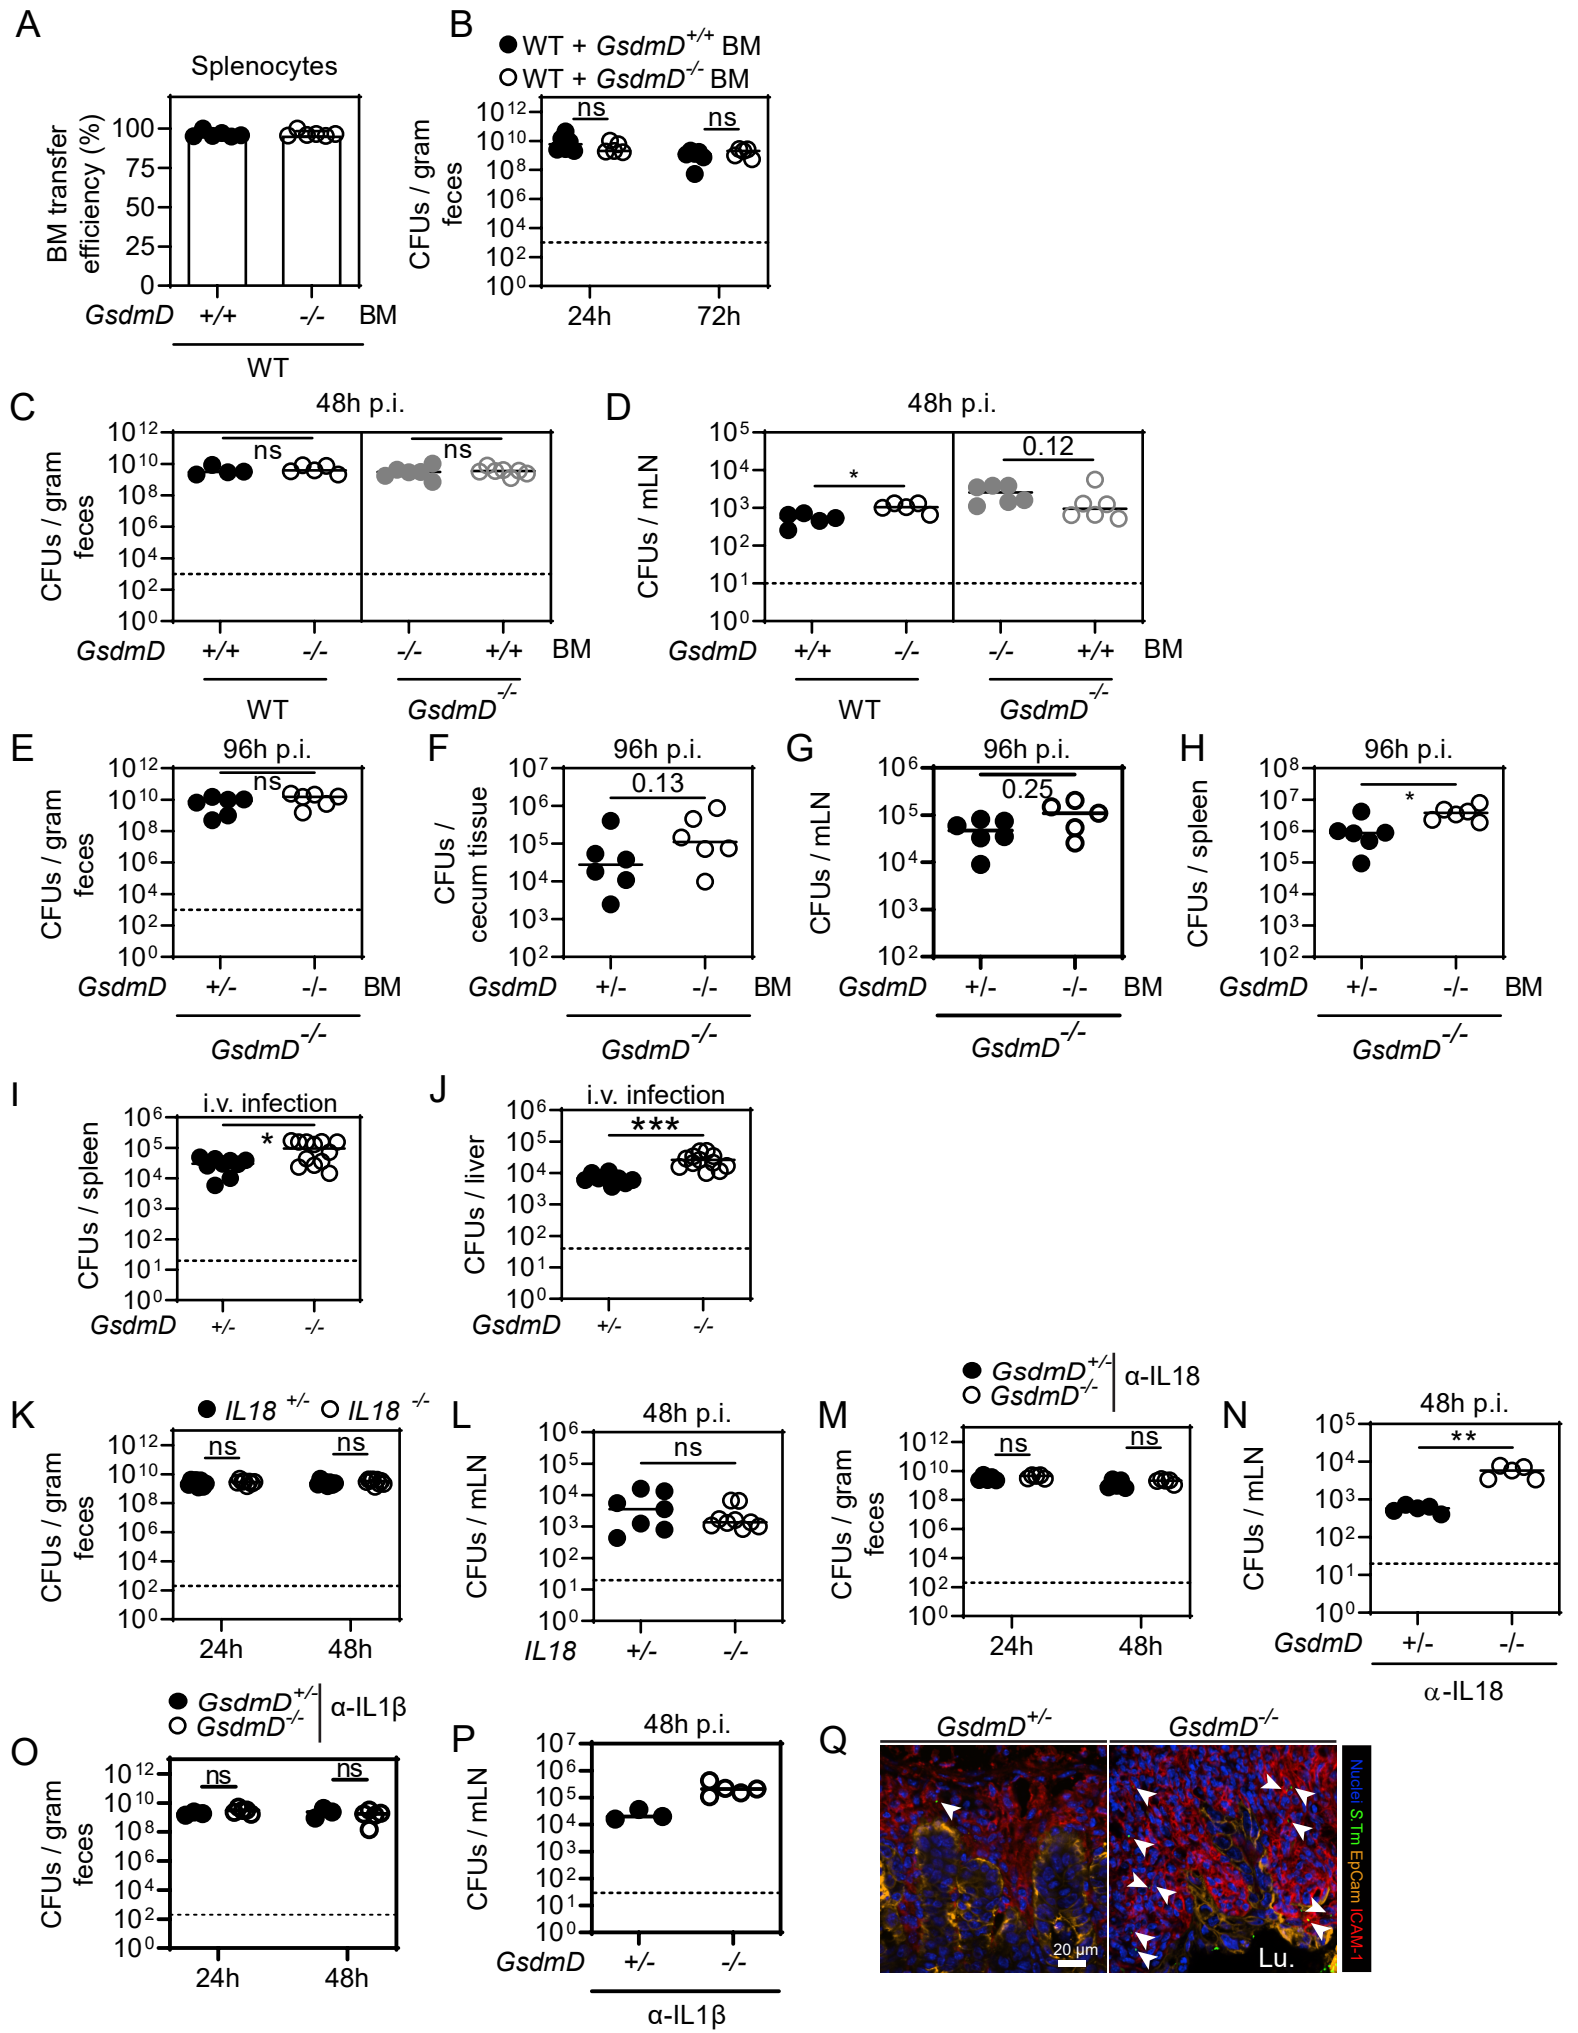

**Figure S4. (Supplementary figure to Fig 3)**

(A-B) 72h infection of BM chimeras. (A) BM transfer efficiency for splenocytes. (B) *S.Tm* pathogen loads in feces over time. (C-H) *GsdmD*<sup>-/-</sup> BM results in elevated *S.Tm* pathogen loads locally and systemically at 48 and 96h p.i. (C-D) 48h infection of BM chimeras with *S.Tm* harboring a *pssaG-GFP* reporter. *S.Tm* pathogen loads in (C) feces, and (D) mesenteric lymph nodes. (E-H) 96h infection of BM chimeras with *S.Tm*. *S.Tm* pathogen loads in (E) feces, (F) cecum tissue, (G) mesenteric lymph nodes, and (H) spleen. (I-J) GSDMD limits *S.Tm* pathogen loads during systemic *S.Tm* infection. *S.Tm* pathogen loads at 24h p.i. of intravenously infected mice in (I) spleen, and (J) liver. (K-L) At 48h p.i., IL18-deficient mice exhibit similar *S.Tm* pathogen loads in (K) feces, (L) mesenteric lymph nodes. (M-N) IL18 is dispensable for GSDMD-dependent *S.Tm* restriction. *S.Tm* pathogen loads at 48h p.i. (M) in feces, and (N) in mesenteric lymph nodes of *GsdmD*<sup>+/-</sup> and *GsdmD*<sup>-/-</sup> littermates in the presence of a neutralizing IL18 antibody. Note, this infection was performed with *S.Tm* harboring a *pssaG-GFP* reporter which explains the overall ca. 10x lower pathogen loads. (O-P) IL1 $\beta$  is dispensable for GSDMD-dependent *S.Tm* restriction. *S.Tm* pathogen loads (O) in feces over time and (P) in mesenteric lymph nodes at 48h p.i. of *GsdmD*<sup>+/-</sup> and *GsdmD*<sup>-/-</sup> littermates in the presence of a neutralizing IL1 $\beta$  antibody. (Q) Representative micrographs of *S.Tm* infected cecum tissue sections at 72h p.i. of *GsdmD*<sup>+/-</sup> and *GsdmD*<sup>-/-</sup> littermates, stained for *S.Tm*-LPS (belongs to Fig 3G-H). Arrowheads indicate *S.Tm* in lamina propria. Lu. - Lumen. In A-P, each data point represents one mouse. Line at median. Dotted line represents detection limit. Mann-Whitney U-test (ns - not significant, \*p<0.05, \*\*p<0.01, \*\*\*p<0.001).

Figure S5 - Supplementary figures to Fig 3

A

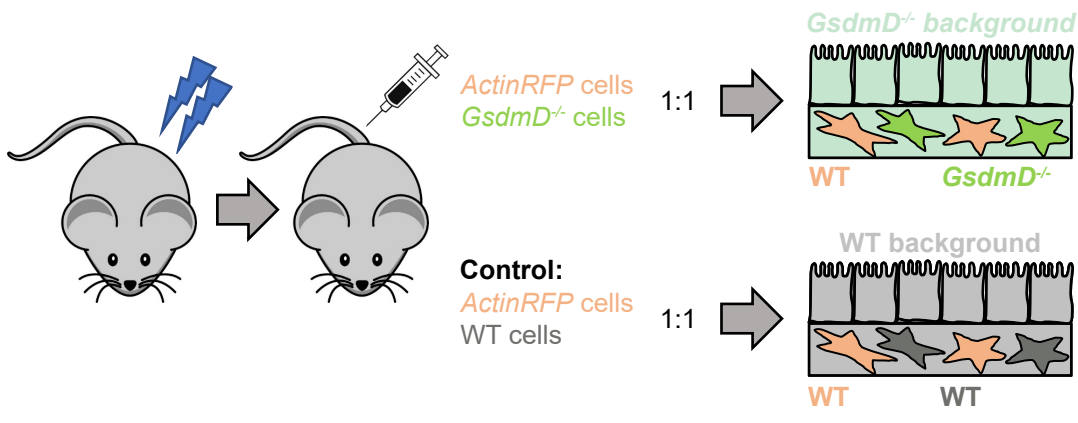

B

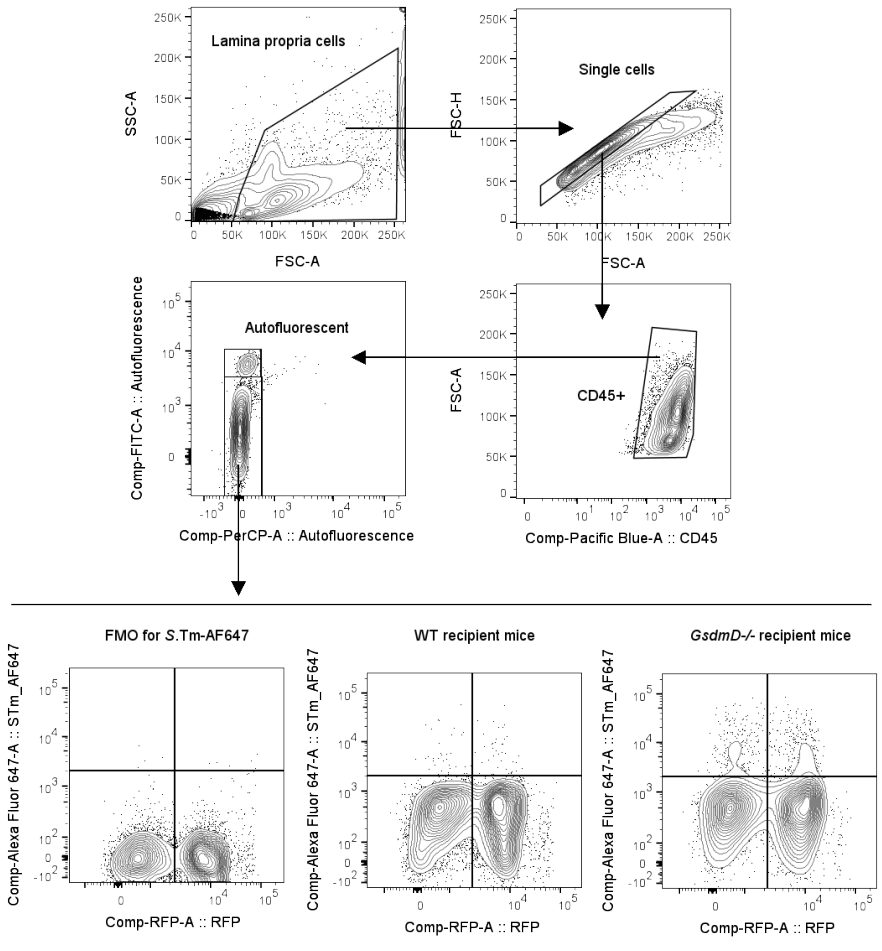

Figure S5. (Supplementary figure to Fig 3)

(A) Graphical illustration of experimental setup. (B) Flow cytometry gating strategy for Fig 3F

Figure S6 - Supplementary figures to Fig 3

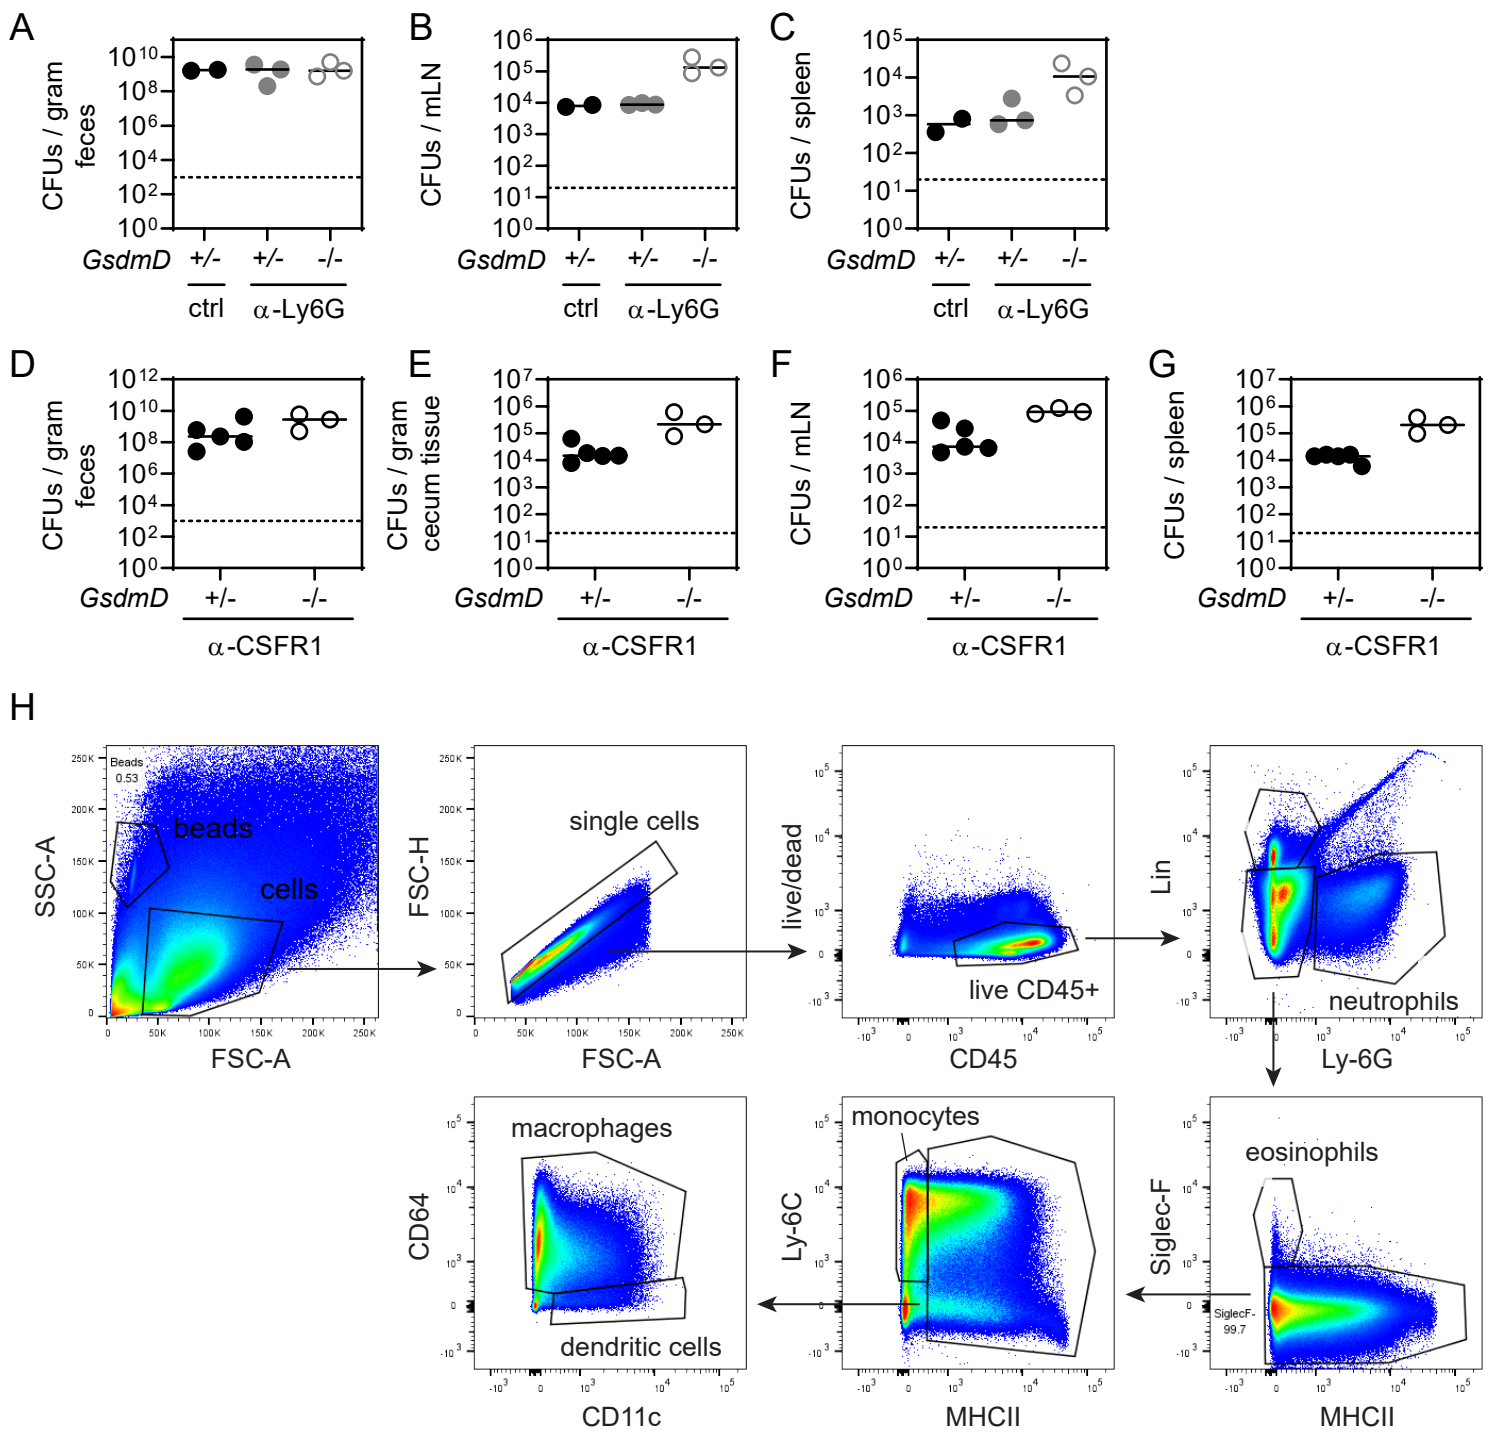

**Figure S6. (Supplementary figure to Fig 3)**  
 (A-G) Depletion neither of neutrophils, nor macrophages, eliminates the GSDMD-dependent phenotype. (A-C) Neutrophil depletion by anti-Ly6G antibody in a 48h *S.Tm* infection of *GsdmD*<sup>+/-</sup> and *GsdmD*<sup>-/-</sup> littermates. Control mice were injected with PBS. *S.Tm* pathogen loads in (A) feces, (B) mesenteric lymph nodes, and (C) spleen. (D-G) Macrophage depletion by anti-CSFR1 antibody in a 72h *S.Tm* infection of *GsdmD*<sup>+/-</sup> and *GsdmD*<sup>-/-</sup> littermates. *S.Tm* pathogen loads in (D) feces, (E) cecum tissue, (F) mesenteric lymph nodes, and (G) spleen. In all panels each data point represents one mouse. Line at median. Dotted line represents detection limit. (H) Gating strategy of flow cytometry analysis to determine lamina propria cell types in Fig 3I-J



Figure S7 - Supplementary figures to Fig 4

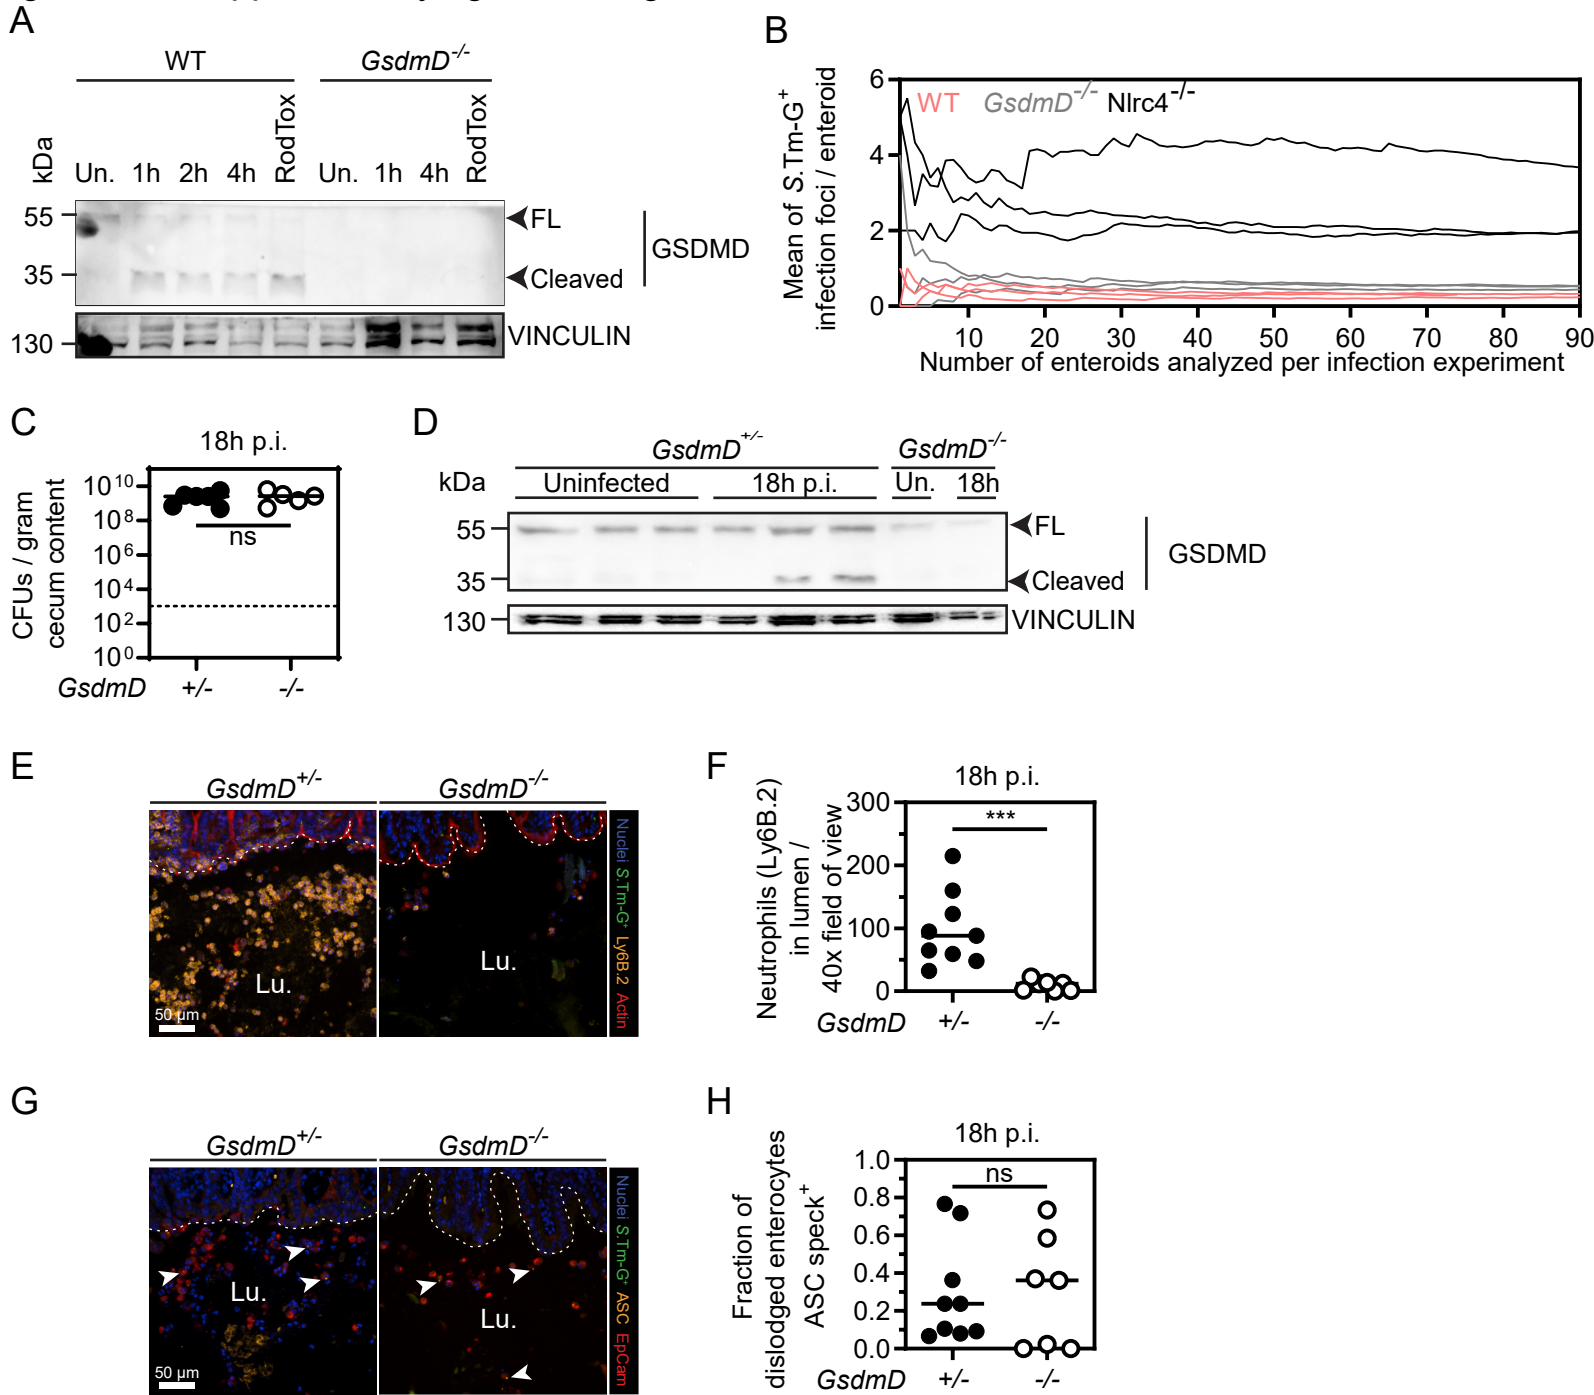

Figure S7. (Supplementary figure to Fig 4)

(A) Western blot analysis of WT and *GsdmD*<sup>-/-</sup> 3D enteroids which were infected in bulk with *S.Tm* for 1h, 2h or 4h. Un. – uninfected. FL – full-length. (B) Determination of a sufficient sampling size for Fig 4A-B. Each line represents one replicate infection. 3 replicate infections per genotype. (C-H) 18h infection of *GsdmD*<sup>+/-</sup> and *GsdmD*<sup>-/-</sup> littermates with *S.Tm* harboring a *psaG-GFP* reporter. (C) *S.Tm* pathogen loads in cecum content. (D) Representative western blot of cecum tissue from *GsdmD*<sup>+/-</sup> and *GsdmD*<sup>-/-</sup> mice infected with *S.Tm* harboring a *psaG-GFP* reporter for 18h. Un. – uninfected. FL – full-length. Note, for 4 out of 5 infected mice we could detect GSDMD-cleavage. (E) Representative micrographs of cecum tissue sections stained for neutrophils (Ly6B.2<sup>+</sup>). Lu. - Lumen. (F) Microscopy-based quantification of neutrophils in lumen / 40x field of view. (G) Representative micrographs of cecum tissue sections stained for ASC specks. Arrowheads indicate ASC speck<sup>+</sup> dislodged enterocytes. Lu. - Lumen. (H) Microscopy-based quantification of the fraction of ASC speck<sup>+</sup> dislodged enterocytes. In A representative blot from two independent experiments. In C, F, H, each data point represents one mouse.  $\geq 5$  mice per group from  $\geq 2$  independent experiments for each comparison. Line at median. Dotted line represents detection limit. Mann-Whitney U-test (ns - not significant, \*\*\* $p < 0.001$ ).

Figure S8

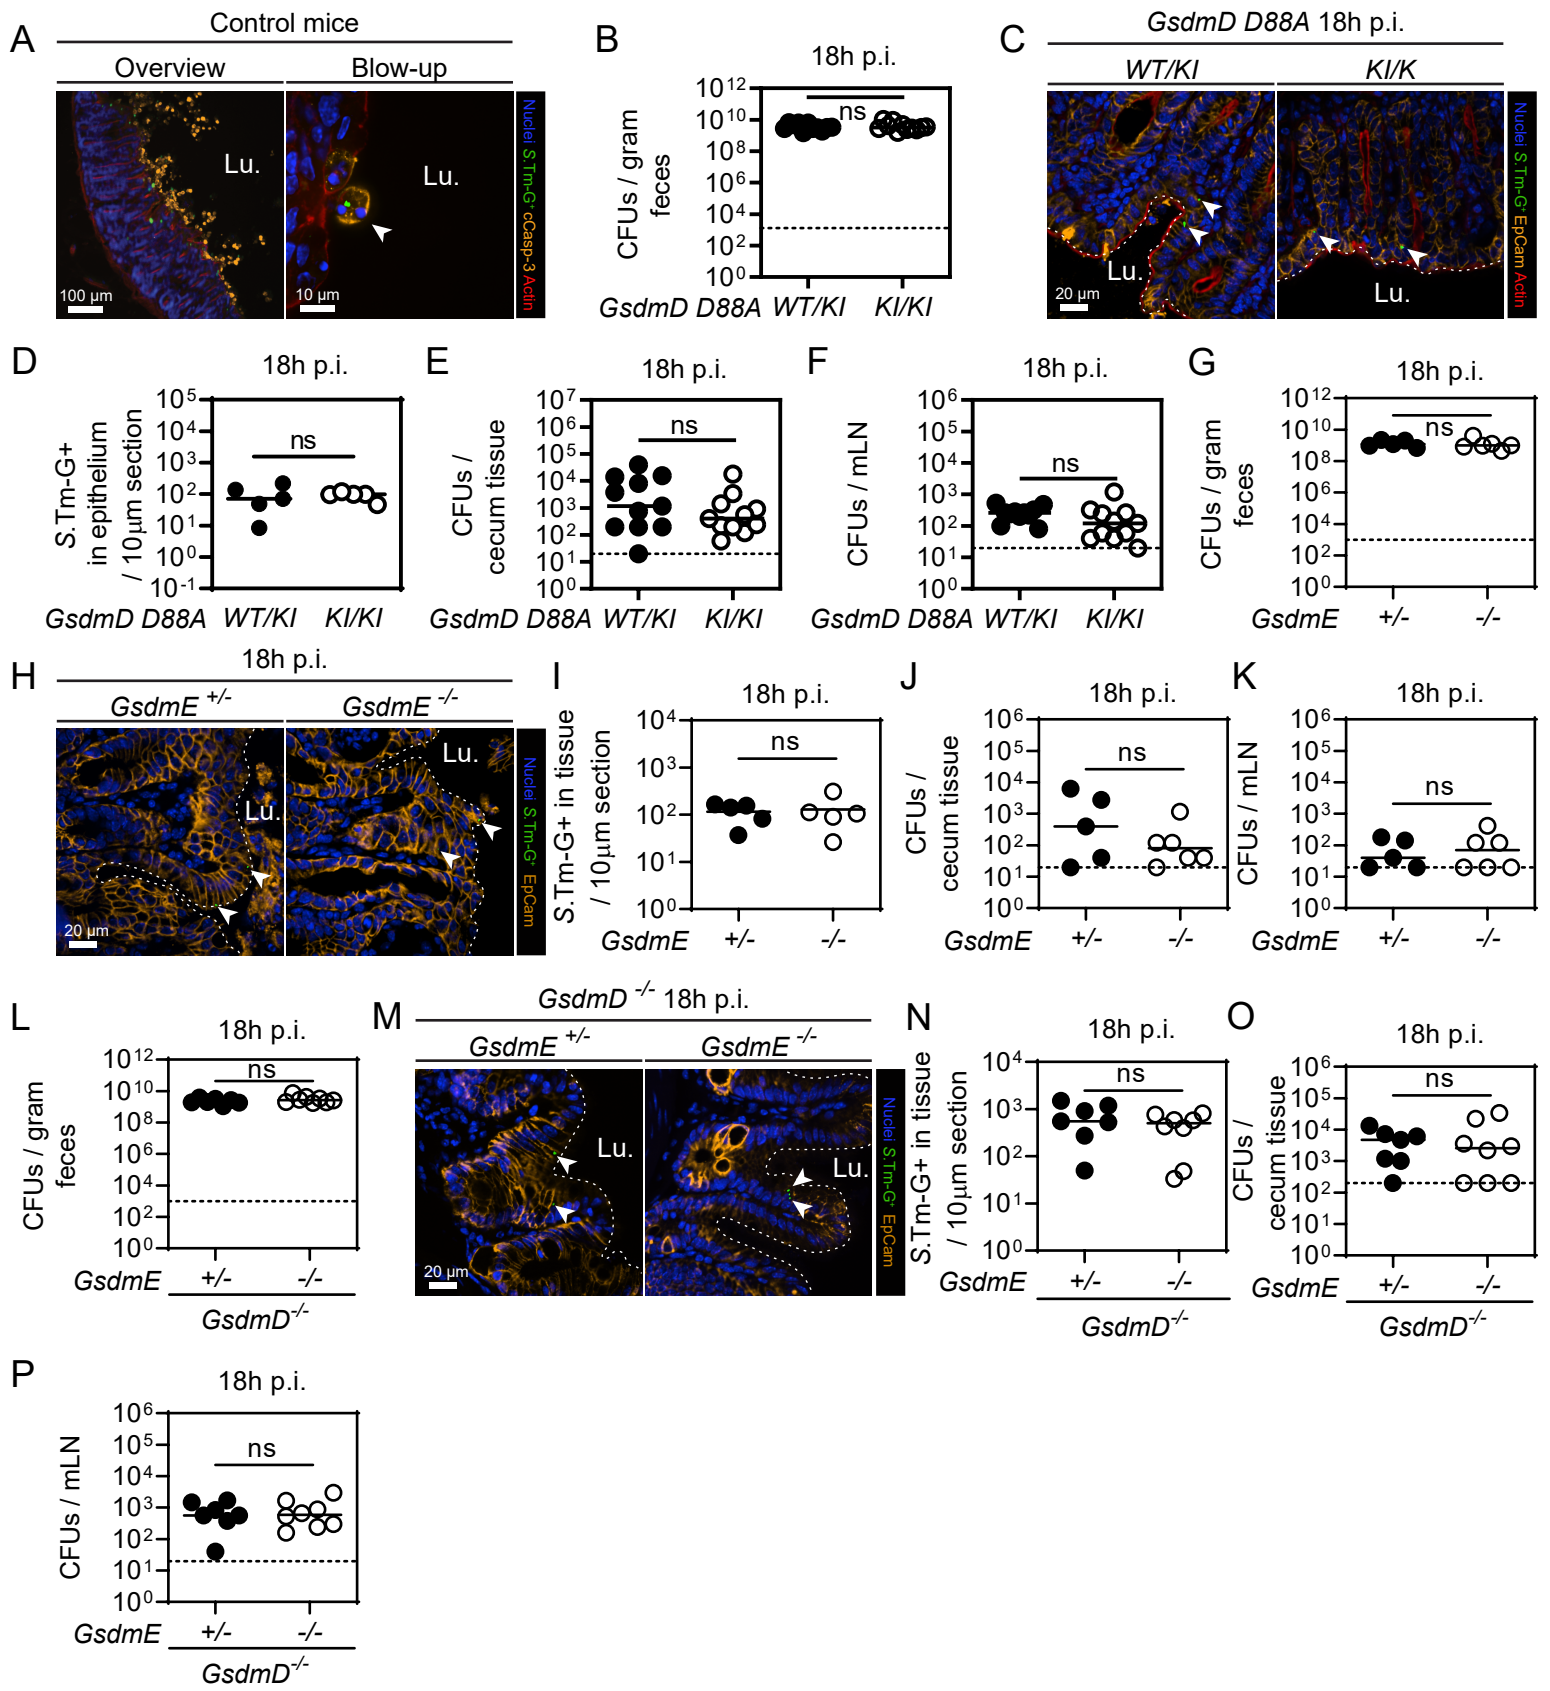

**Figure S8. (Supplementary figure to Fig 4)**

(A) Representative micrographs of cecum tissue sections from a control mouse at 9h p.i. infected with *S.Tm* harboring a *pssaG-GFP* reporter and stained for cleaved Caspase-3. Arrowhead indicates an infected expelling enterocyte. Lu. - Lumen. (B-F) 18h infection of *GsdmD<sup>WT/D88A</sup>* (referred as *WT/KI*) and *GsdmD<sup>D88A/D88A</sup>* (referred as *KI/KI*) littermates with *S.Tm* harboring a *pssaG-GFP* reporter. (B) *S.Tm* pathogen loads in feces. (C) Representative micrographs of cecum tissue sections. Arrowheads indicate *S.Tm-G<sup>+</sup>* in epithelium. Lu. - Lumen. (D) Microscopy-based quantification of *S.Tm-G<sup>+</sup>* in epithelium. *S.Tm* pathogen loads in (E) cecum tissue, and (F) mesenteric lymph nodes. (G-K) 18h infection of *GsdmE<sup>+/-</sup>* and *GsdmE<sup>-/-</sup>* littermates infected with *S.Tm* harboring a *pssaG-GFP* reporter. (G) *S.Tm* pathogen loads in feces. (H) Representative micrographs of cecum tissue sections. Arrowheads indicate *S.Tm-G<sup>+</sup>*. Lu. - Lumen. (I) Microscopy-based quantification of *S.Tm-G<sup>+</sup>* in cecum tissue. *S.Tm* pathogen loads in (J) cecum tissue, and (K) mesenteric lymph nodes. (L-P) 18h infection of *GsdmD<sup>-/-</sup>xGsdmE<sup>+/-</sup>* and *GsdmD<sup>-/-</sup>xGsdmE<sup>-/-</sup>* littermates infected with *S.Tm* harboring a *pssaG-GFP* reporter. (L) *S.Tm* pathogen loads in feces. (M) Representative micrographs of cecum tissue sections. Arrowheads indicate *S.Tm-G<sup>+</sup>*. Lu. - Lumen. (N) Microscopy-based quantification of *S.Tm-G<sup>+</sup>* in cecum tissue. *S.Tm* pathogen loads in (O) cecum tissue, and (P) mesenteric lymph nodes. In B, D-G, I-L, N-P, each data point represents one mouse.  $\geq 5$  mice per group from  $\geq 2$  independent experiments for each comparison. Line at median. Dotted line represents detection limit. Mann-Whitney U-test (ns - not significant).

Figure S9 - Supplementary figures to Fig 5

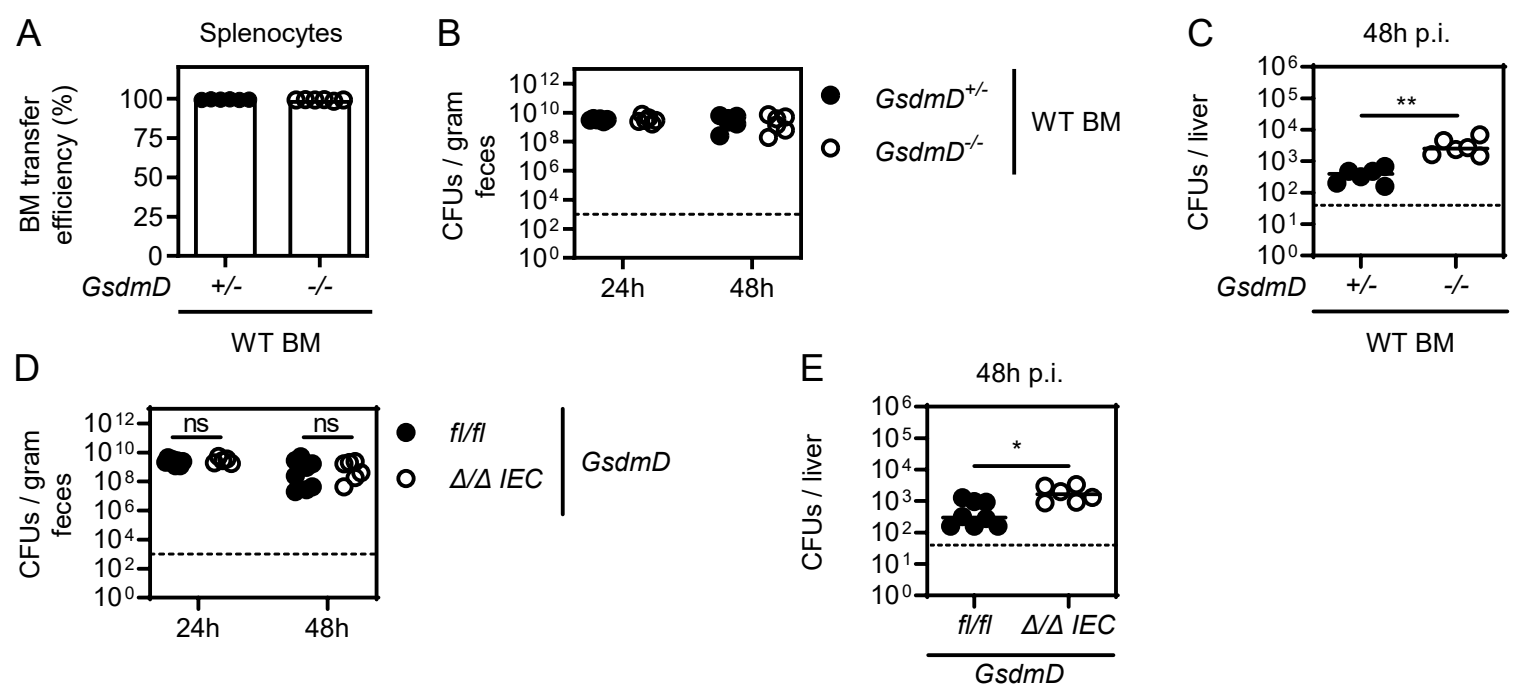

**Figure S9. (Supplementary figure to Fig 5)**  
 (A-C) 48h infection of BM chimeras. (A) BM transfer efficiency for splenocytes. *S.Tm* pathogen loads in (B) feces over time and (C) liver. (D-E) 48h infection of *GsdmD*<sup>fl/fl</sup> and *GsdmD* <sup>$\Delta/\Delta$ IEC</sup> littermates. *S.Tm* pathogen loads in (D) feces over time and (E) liver. Each data point represents one mouse. Line at median. Dotted line represents detection limit. Mann-Whitney U-test (ns - not significant, \*p<0.05, \*\*p<0.01).
